# Supplementary material
Source: Springer Nature journal article supplement (https://www.springermedizin.de/resource/supplementary/12967_2013_1702_MOESM2_ESM.pdf/9575148)
Supplement: MOESM2 [file 9575148]

**Additional File 2.** miRNAs and controls utilized on custom printed PCR plates (SABiosciences) for verification in serum via qPCR. The top 40 dysregulated miRNAs were selected based on the analysis of microarray data from FFPE.

| Mature miRNA Sanger ID | Mature miRNA Accession        |
|------------------------|-------------------------------|
| hsa-let-7b             | MIMAT0000063                  |
| hsa-miR-195            | MIMAT0000461                  |
| hsa-miR-1287           | MIMAT0005878                  |
| hsa-miR-25             | MIMAT0000081                  |
| hsa-miR-17             | MIMAT0000070                  |
| hsa-miR-93             | MIMAT0000093                  |
| hsa-miR-106b           | MIMAT0000680                  |
| hsa-miR-107            | MIMAT0000104                  |
| hsa-miR-223            | MIMAT0000280                  |
| hsa-miR-196b           | MIMAT0001080                  |
| hsa-miR-497            | MIMAT0002820                  |
| hsa-miR-1275           | MIMAT0005929                  |
| hsa-miR-130b           | MIMAT0000691                  |
| hsa-miR-133b           | MIMAT0000770                  |
| hsa-miR-3138           | MIMAT0015006                  |
| hsa-miR-3651           | MIMAT0018071                  |
| hsa-miR-20a            | MIMAT0000075                  |
| hsa-miR-1260b          | MIMAT0015041                  |
| hsa-miR-3663-3p        | MIMAT0018085                  |
| hsa-miR-486-5p         | MIMAT0002177                  |
| hsa-miR-451            | MIMAT0001631                  |
| hsa-miR-221            | MIMAT0000278                  |
| hsa-miR-125b           | MIMAT0000423                  |
| hsa-miR-100            | MIMAT0000098                  |
| hsa-miR-15b            | MIMAT0000417                  |
| hsa-miR-199b-5p        | MIMAT0000263                  |
| hsa-miR-149            | MIMAT0000450                  |
| hsa-miR-720            | MIMAT0005954                  |
| hsa-miR-1260           | MIMAT0005911                  |
| hsa-miR-103a           | MIMAT0000101                  |
| hsa-miR-141            | MIMAT0000432                  |
| hsa-miR-199a-3p        | MIMAT0000232                  |
| hsa-miR-142-3p         | MIMAT0000434                  |
| hsa-miR-29c            | MIMAT0000681                  |
| hsa-miR-26a            | MIMAT0000082                  |
| hsa-miR-30e            | MIMAT0000692                  |
| hsa-miR-143            | MIMAT0000435                  |
| hsa-miR-203            | MIMAT0000264                  |
| hsa-miR-34c-5p         | MIMAT0000686                  |
| hsa-miR-99a            | MIMAT0000097                  |
| SNORD61                | miScript PCR Control snoRNA   |
| SNORD72                | miScript PCR Control snoRNA   |
| SNORD95                | miScript PCR Control snoRNA   |
| SNORD96A               | miScript PCR Control snoRNA   |
| miRTC                  | Reverse Transcription Control |
| miRTC                  | Reverse Transcription Control |
| PPC                    | Positive PCR Control          |
| PPC                    | Positive PCR Control          |
